# Supplementary material for: Hemocompatible nucleosome-inspired heparin-mimicking hydrogel microspheres for safe and efficient extracorporeal removal of circulating histones in critically ill patients
Source: Royal Society of Chemistry journal article supplement (doi:10.1039/d4tb01952k), 2025-01-01
Supplement: d4tb01952k1.pdf [file d4tb01952k1.pdf]

1 Supporting Information

2 Hemocompatible nucleosome-inspired  
3 heparin-mimicking hydrogel microspheres for  
4 safe and efficient extracorporeal removal of  
5 circulating histones in critically ill patients

6 *Yu Chen<sup>a</sup>, Tinghang Yang<sup>b</sup>, Shujing Wang<sup>c</sup>, Dongmei Tong<sup>a</sup>, Xianda Liu<sup>a</sup>, Yupei Li<sup>b\*</sup>,*  
7 *Weifeng Zhao<sup>a\*\*</sup>, Changsheng Zhao<sup>a</sup>*

8

9 a College of Polymer Science and Engineering, State Key Laboratory of Polymer  
10 Materials Engineering, Sichuan University, Chengdu 610065, China

11 b Department of Nephrology, Kidney Research Institute, West China Hospital of  
12 Sichuan University, Chengdu 610041, China

13 c Department of Nephrology, Kidney Research Institute, Frontiers Science Center for  
14 Disease-related Molecular Network, West China Hospital of Sichuan University,  
15 Chengdu 610041, China

## 16 1. EXPERIMENTAL SECTION

### 17 1.1. Materials

18 Polyethersulfone (PES) was purchased from BASF Chemical Company (Ultrason  
19 E6020P, Germany). N-vinyl-2-pyrrolidone (VP, 99.0%), acrylic acid (AA, 99.0%), 2-  
20 acrylamido-2-methyl-1-propanesulfonic acid (AMPS, 98%), N, N'-methylene  
21 bis(acrylamide) (MBA,  $C_7H_{10}N_2O_2$ , for molecular biology,  $\geq 99.0\%$ ), 2,2-  
22 azobisisobutyronitrile (AIBN, 98.0%), ammonium persulfate (APS,  $(NH_4)_2S_2O_8$ , AR,  
23  $\geq 98.0\%$ ), sodium dodecyl sulfate (SDS, 98.0%), sodium hydroxide (NaOH, 97.0%),  
24 heparin sodium salt ( $\geq 180$  USP units/mg), ethanol ( $CH_3CH_2OH$ , AR,  $\geq 99.7\%$ ), and  
25 phosphate-buffered saline (PBS, pH = 7.4) were purchased from Aladdin Reagent Co.  
26 Ltd. (Shanghai, China). N, N'-Dimethylacetamide (DMAc,  $\geq 99.8\%$ ) was purchased  
27 from Chengdu Kelong Chemical Reagent Co. Ltd. (China). Bovine serum albumin  
28 (BSA) and hirudin were purchased from Sigma Chemical Co. Ltd. (St. Louis, MO,  
29 USA). The ungraded mixture of calf thymus histones was purchased from Sangon  
30 Biotechnology Inc. (Shanghai, China). Micro BCA<sup>TM</sup> protein assay reagent kit was  
31 purchased from PIERCE Inc. Human complement fragment 3a (C3a) kit, and a human  
32 complement fragment 5a (C5a) kit were purchased from Cusabio Biotech, China. The  
33 deionized (DI) water used in all the experiments was prepared by a deionized lab water  
34 system. All the chemicals were used as received.

## 35 1.2. Preparation of the RCHMs

36 Table S1 Composition of the reaction solution

| The<br>reaction<br>solution   | AA<br>(g) |       | AMPS<br>(g) |       | MBA<br>(g) | APS<br>(g) | DI<br>water<br>(g) |
|-------------------------------|-----------|-------|-------------|-------|------------|------------|--------------------|
| A <sub>1</sub> M <sub>3</sub> | 3.75      | 0.052 | 11.25       | 0.055 | 0.6        | 0.15       | 34                 |
| A <sub>2</sub> M <sub>2</sub> | 7.50      | 0.104 | 7.50        | 0.036 | 0.6        | 0.15       | 34                 |
| A <sub>3</sub> M <sub>1</sub> | 11.25     | 0.156 | 3.75        | 0.018 | 0.6        | 0.15       | 34                 |
| A <sub>0</sub> M <sub>0</sub> | /         | /     | /           | /     | /          | /          | 50                 |

## 37 1.3. Characterization of the RCHMs

### 38 1.3.1. Fourier transform infrared spectroscopy (FTIR)

39 The microspheres were freeze-dried for 24 h to remove moisture, and then the dried  
40 microspheres were placed in a mold and the samples were detected in the transmission  
41 mode of an FTIR spectrometer (Thermo Fisher Nicolet iS50, USA) with a scan range  
42 of 4000-500 cm<sup>-1</sup> and a resolution of 2 cm<sup>-1</sup>. The average of 32 scans was taken as the  
43 result for each sample tested.

### 44 1.3.2. Thermogravimetric analysis (TGA)

45 The microspheres were freeze-dried, and then the samples with a dry weight of about  
46 5~10 mg was placed in a ceramic crucible. The TGA curves were obtained using a  
47 thermogravimetric analyzer (METTLER TOLEDO TGA/DSC 3+, Switzerland). The  
48 heating program was set to 50 °C constant temperature equilibrium for 30 min, followed

49 by heating from 50 °C to 800 °C at a heating rate of 10 °C/min, the whole test was  
50 carried out under N<sub>2</sub> atmosphere.

#### 51 *1.3.3. Elemental analysis (EA)*

52 The microspheres were freeze-dried, and then the samples with a dry weight of about  
53 2 mg were placed into an elemental analyzer (Elementar UNICUBE, DEU) to analyze  
54 the contents of carbon, nitrogen, sulfur, and hydrogen in different microspheres  
55 directly. Two parallel analyses were conducted for each sample and the final elemental  
56 results were averaged over the two analyses.

#### 57 *1.3.4. X-ray photoelectron spectroscopy (XPS)*

58 The microspheres were freeze-dried and analyzed using an X-ray photoelectron  
59 spectrometer (Thermo Scientific ESCALAB Xi+, USA). The vacuum degree of the  
60 analysis chamber was  $1 \times 10^{-9}$  Pa, and the excitation source was an Al  $K\alpha$  ray ( $h\nu =$   
61 1486.6 eV). The operating voltage was 13.4 kV, the filament current was 6 mA, and  
62 the signal accumulation was performed for five cycles. The resulting data were  
63 analyzed using the Thermo Scientific™ Avantage software.

#### 64 *1.3.5. Mercury intrusion porosimetry (MIP)*

65 The microspheres were freeze-dried, and then the samples with a dry weight of  
66 approximately 200 mg were subjected to analysis in an Automatic Mercury Pressure  
67 Meter (MicroActive AutoPore V 9600, USA) to determine the specific surface area,  
68 porosity, and pore distribution of the microspheres.

#### 69 *1.3.6. Scanning electron microscopy (SEM)*

70 The cross-sectional samples were rapidly frozen with liquid nitrogen and then  
71 sectioned with a blade. Subsequently, the samples were freeze-dried and sprayed with  
72 gold on the surfaces by ion sputtering (vacuum degree 8 kPa, current 6-8 mA). This  
73 was followed by observation under a scanning electron microscope (Phenom Pure,  
74 Netherlands).

## 75 **1.4. Hemocompatibility evaluation**

### 76 *1.4.1. Blood collection*

77 Fresh human blood was obtained from healthy volunteers (22–28 years old) and  
78 collected using 5 mL vacuum tubes (Jiangsu Kangjian Medical Products Co., Ltd.) for  
79 *in vitro* hemocompatibility evaluation assays. All hemocompatibility experiments  
80 complied with national guidelines (GB/T 16886.4-2003/ISO 10993-4:2002) and were  
81 approved and executed by West China Hospital of Sichuan University (ethical approval  
82 number: 2024553).

### 83 *1.4.2. Blood cell counts*

84 Blood cell count assay were performed to investigate the impact of the RCHMs on  
85 blood cells. The microspheres were previously immersed in PBS overnight. 100 mg of  
86 microspheres were added to 500  $\mu$ L of fresh whole blood (EDTA anticoagulated,  
87 anticoagulant-to-blood ratio = 1:9 (v/v)) and incubated with the whole blood at 37 ° C  
88 for 30 min. The remaining blood was then collected. The whole blood cell counts were  
89 measured by an automated hematology cell analyzer (Mindray BC-5100, China)  
90 according to the provided instructions. The results were expressed as the mean  $\pm$  SD (n  
91 = 3).

92 *1.4.3. Hemolysis ratio*

93 The measurement of hemolysis ratio was used to evaluate the erythrocyte  
94 compatibility of the microspheres. The microspheres were previously immersed in PBS  
95 overnight. 5 mL of whole blood (sodium citrate anticoagulated, anticoagulant-to-blood  
96 ratio = 1:9 (v/v)) was firstly added to 10 mL of calcium- and magnesium-free saline,  
97 and then centrifuged at 2000 rpm for 10 min to separate the erythrocytes from the  
98 plasma. This process was repeated at least five times. The erythrocytes obtained after  
99 centrifugation were diluted 20 times with saline to obtain red blood cell suspension.  
100 During the hemolysis test, 10 mg of microspheres were added into 1 mL of the diluted  
101 red blood cell suspension and incubated at 37 °C for 3 h. The negative control was  
102 prepared by combining 0.2 mL of red blood cell suspension with 0.8 mL of saline, while  
103 the positive control was prepared by combining 0.2 mL of red blood cell suspension  
104 with 0.8 mL of DI water. After centrifuging at 7000 rpm for 3 min, the suspensions  
105 were collected to measure the absorbance of the released hemoglobin at 540 nm by a  
106 UV-Vis spectrometer (UV-1750, Shimadzu Co., Ltd, Japan). The hemolysis ratios of  
107 the microspheres were then calculated using Equation S1

108 
$$\text{Hemolysis ratio (\%)} = \frac{A_s - A_n}{A_p - A_n} \times 100\% \quad (\text{S1})$$

109 where  $A_s$ ,  $A_p$ , and  $A_n$  are the absorbance of the samples, positive control, and negative  
110 control, respectively. The results were expressed as mean  $\pm$  SD (n = 3).

111 *1.4.4. Evaluation of complement activation*

112 Serum concentrations of C3a and C5a were measured by commercial ELISA kits  
113 (Thermo Fisher Human Complement C3a ELISA Kit and Thermo Fisher Human

114 Complement C5a ELISA Kit) to evaluate complement activation. The microspheres  
115 were previously immersed in PBS overnight. 50 mg of microspheres in each group were  
116 incubated with 150  $\mu$ L of fresh blood (anticoagulated with 16000 ATU/mL  
117 recombinant hirudin, anticoagulant-to-blood ratio = 1:40 (v/v)) at 37  $^{\circ}$ C for 30 min.  
118 The blood co-cultured with the microspheres was centrifuged at 6500 rpm for 10 min,  
119 and the supernatant was diluted (1/1000 for the C3a test, 1/25 for the C5a test). 100  $\mu$ L  
120 of the diluted sample or standard solution was added to the ELISA test well plate coated  
121 with the specific antibody. The detections were conducted according to the respective  
122 instructions and the whole blood sample was employed as the control. The results were  
123 expressed as mean  $\pm$  SD (n = 3).

## 124 **1.5. *In vitro* histone adsorption**

### 125 *1.5.1. Static histone adsorption*

126 To assess the adsorption performance of the RCHMs for histones, mixed calf thymus  
127 histones were added to PBS buffer to prepare a series of histone solutions with  
128 concentrations of 100, 200, and 300  $\mu$ g/mL. Then, 200 mg of the RCHMs was added  
129 to 1 mL of histone solution and shaken at 37  $^{\circ}$ C for 4 h. After that, the histone  
130 concentration was measured by the Micro BCA<sup>TM</sup> protein assay reagent kit, and the  
131 removal ratio and adsorption capacity of histones by the RCHMs were calculated  
132 according to Equations S2 and S3, respectively.

$$133 \quad \text{Removal ratio (\%)} = \frac{C_0 - C_t}{C_0} \times 100\% \quad (\text{S2})$$

$$134 \quad q = \frac{(C_0 - C_t)V}{m} \times 100\% \quad (\text{S3})$$

135 where  $C_0$  and  $C_t$  ( $\mu\text{g/mL}$ ) are the initial and residual histone concentrations at time  $t$ ,  $q$   
136 ( $\mu\text{g/mg}$ ) is the adsorption capacity of histone,  $V$  (mL) is the histone solution volume,  
137 and  $m$  (mg) is the wet weight of microspheres. The results were expressed as mean  $\pm$   
138 SD ( $n = 3$ ).

139 The detailed information of Micro-BCA<sup>TM</sup> is as follows: Micro-BCA<sup>TM</sup> is a  
140 detergent-compatible bicinchoninic acid formulation for the colorimetric detection and  
141 quantitation of total protein. The method uses bicinchoninic acid (BCA) as the detection  
142 reagent for  $\text{Cu}^{1+}$ , which is formed when  $\text{Cu}^{2+}$  is reduced by protein in an alkaline  
143 environment. A purple-colored reaction product is formed by the chelation of two  
144 molecules of BCA with one cuprous ion ( $\text{Cu}^{1+}$ ). This water-soluble complex exhibits a  
145 strong absorbance at 562 nm that is linear with increasing protein concentrations.

#### 146 *1.5.2. Dynamic histone adsorption*

147 To investigate the adsorption kinetics of histones by microspheres, an initial  
148 concentration of 300  $\mu\text{g/mL}$  was selected for the histone time-dynamic adsorption  
149 assay. 200 mg of the RCHMs was incubated with 1 mL of the histone solution at 37 °C.  
150 The concentrations of histones were measured at 5, 10, 15, 30, 60, 90, 120, 180, 240,  
151 300, 360, and 480 min by the Micro BCA<sup>TM</sup> protein assay reagent kit and the adsorption  
152 capacity of histones by the RCHMs was calculated according to Equation S3. The  
153 results were expressed as mean  $\pm$  SD ( $n = 3$ ).

154 The histone adsorption kinetics results of RCHMs were then fitted with pseudo-first-  
155 order (Equation S4) and pseudo-second-order (Equation S5) adsorption kinetics  
156 models:



157 
$$\ln(q_e - q_t) = \ln q_{e,cal,1} - k_1 t \quad (S4)$$

158 
$$\frac{t}{q_t} = \frac{1}{k_2 q_{e,cal,2}^2} + \frac{t}{q_{e,cal,2}} \quad (S5)$$

159 where  $q_e$  ( $\mu\text{g}/\text{mg}$ ) is the experimental equilibrium histone adsorption capacity;  $q_t$   
160 ( $\mu\text{g}/\text{mg}$ ) is the histone adsorption amount at time  $t$ ;  $q_{e, cal,1}$  ( $\mu\text{g}/\text{mg}$ ) and  $q_{e, cal,2}$  ( $\mu\text{g}/\text{mg}$ )  
161 are the equilibrium histone adsorption calculated by pseudo-first-order and pseudo-  
162 second-order models, respectively; and  $k_1$  ( $\text{min}^{-1}$ ) and  $k_2$  ( $\text{g min}/\text{mg}$ ) are the rate  
163 constants of the pseudo-first-order and pseudo-second-order models, respectively. The  
164 fitting parameters of the pseudo-second-order model can be used to calculate the initial  
165 adsorption rate ( $h$ ) using Equation S6.

166 
$$h = k_2 q_{e,cal,2}^2 \quad (S6)$$

167 where  $h$  ( $\text{mg g}^{-1} \text{min}^{-1}$ ) is the initial adsorption rate calculated by the pseudo-second-  
168 order model,  $k_2$  ( $\text{g min}^{-1} \text{mg}^{-1}$ ) is the rate constant of the pseudo-second-order model,  
169 and  $q_{e, cal,2}$  ( $\mu\text{g}/\text{mg}$ ) is the equilibrium histone adsorption amount calculated by the  
170 pseudo-second-order model.

171 To investigate adsorption isotherms, histones were added to PBS to prepare histone  
172 solutions with concentrations of 100, 200, 300, 600, 900, 1200, 1800, and 2400  $\mu\text{g}/\text{mL}$ .  
173 Then, 200 mg of the RCHMs was loaded into 1 mL of the histone solution and shaken  
174 at 37 °C. By the conclusion of the previous experiment, equilibrium was reached in the  
175 adsorption process at 4 h. At this point, the supernatant absorbance was measured by  
176 the Micro BCA™ protein assay reagent kit at 562 nm to calculate the equilibrium  
177 concentration ( $C_e$ ) using a standard curve. Then, the equilibrium histone adsorption ( $q_e$ )  
178 was obtained using Equation S3.

179 The isotherm results were fitted using the Langmuir and Freundlich adsorption  
180 isotherm models with linear and nonlinear forms (Equations S7-10).

181 linear Langmuir model:  $\frac{1}{q_e} = \frac{1}{q_m K_L C_e} + \frac{1}{q_m}$  (S7)

182 nonlinear Langmuir model:  $q_e = \frac{q_m K_L C_e}{1 + K_L C_e}$  (S8)

183 linear Freundlich model:  $\ln q_e = \frac{1}{n} \ln C_e + \ln K_F$  (S9)

184 nonlinear Freundlich model:  $q_e = K_F C_e^{1/n}$  (S10)

185 where  $q_e$  (mg/g) is the histone adsorption amount (mg) per unit amount (g) of the  
186 RCHMs at equilibrium,  $C_e$  ( $\mu\text{g/mL}$ ) is the equilibrium histone concentrations,  $q_m$  (mg/g)  
187 is the maximum adsorption capacity calculated by the Langmuir model;  $K_L$  (mL/ $\mu\text{g}$ )  
188 and  $K_F$  (( $\mu\text{g/mg}$ ) (mL/ $\mu\text{g}$ ) $^{1/n}$ ) are the Langmuir and Freundlich constants, respectively;  
189  $1/n$  is the constant which incorporate factors affecting the adsorbed amount at  
190 equilibrium.

## 191 1.6. Static BSA adsorption

192 The amount of adsorbed albumin was measured by Ultraviolet spectrophotometry  
193 (UV-1750, Shimadzu Co., Ltd, Japan) and Micro BCA<sup>TM</sup> protein assay reagent kit. To  
194 test the resistance to protein contamination of the RCHMs, BSA was added to PBS to  
195 prepare BSA solutions of 300  $\mu\text{g/mL}$  and 1000  $\mu\text{g/mL}$ . Then, 200 mg of the RCHMs  
196 was added into the BSA solution and shaken at 37 °C for 4 h. The BSA concentration  
197 was measured, and the BSA adsorption capacity was calculated according to Equations  
198 S3. The results were expressed as mean  $\pm$  SD (n = 3).

199 **2. RESULTS AND DISCUSSION**

200 **2.1. Synthesis and characterizations of the microspheres**

201 **Table S2.** Analysis of elemental content in different raw materials.

| Raw materials | C (wt.%) | S (wt.%) | N (wt.%) | H (wt.%) |
|---------------|----------|----------|----------|----------|
| PES           | 62.0     | 13.8     | 0        | 3.5      |
| VP            | 64.8     | 0        | 12.6     | 8.2      |
| AA            | 50.0     | 0        | 0        | 5.6      |
| AMPS          | 40.6     | 15.5     | 6.8      | 6.3      |

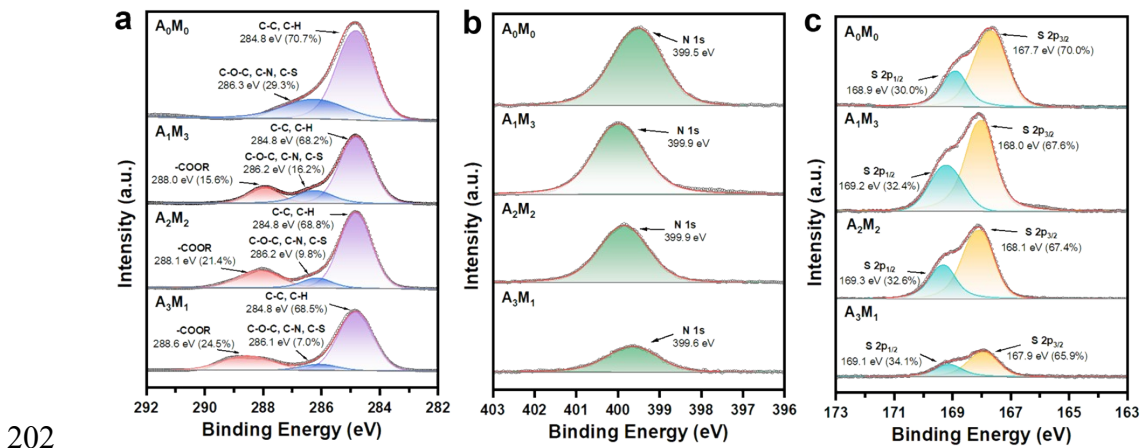

203 **Figure S1.** (a) C 1s (b) N 1s and (c) S 2p fitted high-resolution XPS spectra of the  
204 microspheres.

205 **2.2. Histone adsorption performance**

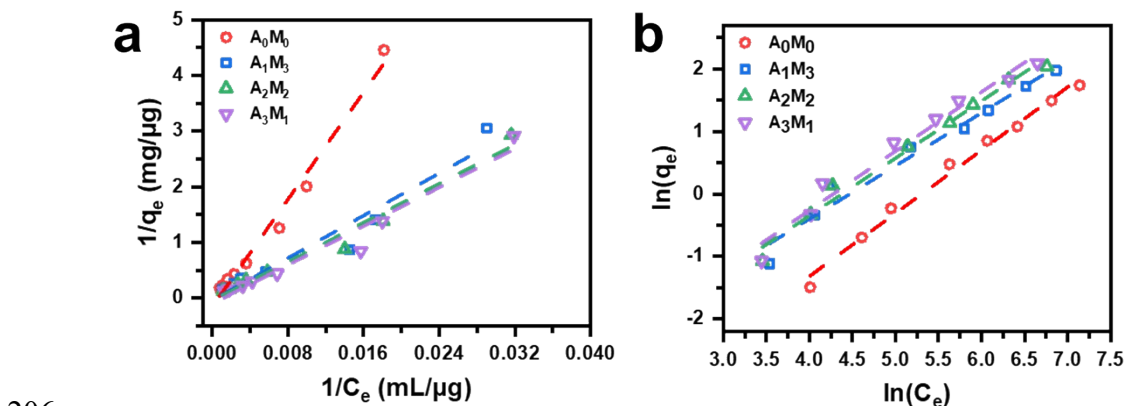

207 **Figure S2.** Adsorption isotherms of the RCHMs toward histones. (a) linear Langmuir  
 208 and (b) linear Freundlich model fitting plots.

209 **Table S3.** Adsorption isotherm parameters of the microspheres toward histones.

| Samples                       | nonlinear Langmuir                   |                                      |         | nonlinear Freundlich |                                                                                    |         |
|-------------------------------|--------------------------------------|--------------------------------------|---------|----------------------|------------------------------------------------------------------------------------|---------|
|                               | $q_m$<br>( $\mu\text{g}/\text{mg}$ ) | $K_L$<br>( $\text{mL}/\mu\text{g}$ ) | $R^2$   | $n$                  | $K_F$<br>( $\mu\text{g}/\text{mg}$ )<br>( $\text{mL}/\mu\text{g}$ ) <sup>1/n</sup> | $R^2$   |
| A <sub>0</sub> M <sub>0</sub> | 26.71                                | 2.15125E-4                           | 0.99771 | 1.13264              | 0.01055                                                                            | 0.99676 |
| A <sub>1</sub> M <sub>3</sub> | 21.78                                | 5.09257E-4                           | 0.99036 | 1.26448              | 0.03167                                                                            | 0.99395 |
| A <sub>2</sub> M <sub>2</sub> | 21.46                                | 6.70346E-4                           | 0.99330 | 1.26277              | 0.03801                                                                            | 0.98793 |
| A <sub>3</sub> M <sub>1</sub> | 20.47                                | 8.35232E-4                           | 0.99551 | 1.28153              | 0.04583                                                                            | 0.99212 |

210 **2.3. Inhibition of extracellular histone-induced platelet aggregation by RCHMs**

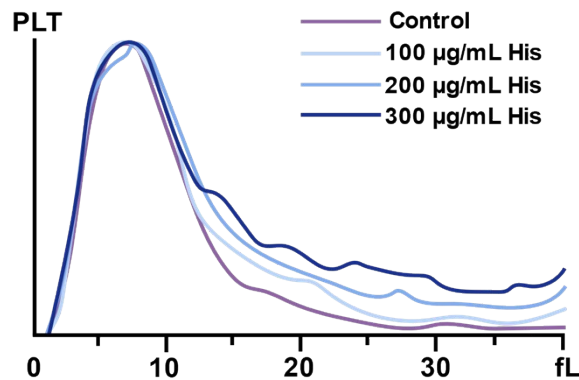

211

212 **Figure S3.** Platelet volume distribution histogram in histone-treated whole blood

213 samples.
